# Supplementary material for: Older Adults’ Experiences of Using Strategies to Maintain and Foster Social Participation: A Systematic Review with Metasynthesis of Qualitative Studies
Source: Hindawi journal article supplement (doi:10.1155/2024/7877128), 2024-01-01
Supplement: f1 [file 7877128.f1.docx]

Appendix 1. Full database search strategy

**PubMed:** searched 2022-03-16 with 2778 hits

(aging OR aged OR "aged, 80 and over" OR retirement OR widowhood OR "frail elderly" OR aging[MeSH Terms] OR aged[MeSH Terms] OR "aged, 80 and over"[MeSH Terms] OR retirement[MeSH Terms] OR widowhood[MeSH Terms] OR "frail elderly"[MeSH Terms] OR elderly OR widowed OR "care giver" OR older)

AND

(“social participation” OR togetherness OR “social activities” OR loneliness OR “social isolation” OR loneliness [MeSH Terms] OR “social isolation” [MeSH Terms]

AND

**(adapt* OR strategies OR coping)**

**CINAHL:** searched 2022-03-16 with 1461 hits

((MH "Aged+") OR "Aged" OR (MH "Aging+") OR "Aging" OR (MH "Aged, 80 and Over") OR "Aged, 80 and Over" OR (MH "Frail Elderly") OR "Frail Elderly" OR (MH "Retirement") OR "retirement" OR "widowhood" OR "care giver" OR "elderly" OR "widowed" OR "older")

AND

((MH "Social Participation") OR "social participation" OR "togetherness" OR "social activities" OR (MH "Loneliness") OR "loneliness" OR (MH "Social Isolation+") OR "social isolation")

AND

("strategies" OR "adapt*" OR (MH "Adaptation, Psychological+") OR (MH "Coping+") OR "coping" OR "occupation")

**AMED:** searched 2022-03-16 with 46 hits

"Aged" OR "Aging" OR "Aged, 80 and Over" OR "Frail Elderly" OR "retirement" OR "widowhood" OR "care giver" OR "elderly" OR "widowed" OR "older"

AND

"social participation" OR "togetherness" OR "social activities" OR "loneliness" OR "social isolation"

AND

"strategies" OR "adapt*" OR "coping" OR "occupation"

**PsycInfo:** searched 2022-03-16 with 274 hits

(DE "Older Adulthood") OR aged OR aging OR (DE "Aging") OR “aged, 80 and over” OR elderly OR retirement OR (DE "Retirement") OR caregiver OR widowed OR
(DE "Widows") OR (DE "Widowers") OR older

AND

“social participation” OR togetherness OR “social activities OR loneliness OR (DE “loneliness”) OR “social isolation” OR (DE "Social Isolation")

AND

“strategies” OR (DE "Strategies") OR adapt* OR (DE "Adaptation") OR occupation
